# Supplementary material
Source: PubMed Central journal article supplement (PMC10074253)
Supplement: mmc1.pdf [file mmc1.pdf]

**The Innovation, Volume 4**

**Supplemental Information**

**Targeted protein degradation in cancers: Orthodox PROTACs and beyond**

**Jin Li, Xinxin Chen, Aiping Lu, and Chao Liang**

## **Supplemental Information**

### **Targeted Protein Degradation in Cancers: Orthodox PROTACs and Beyond**

**Jin Li, Xinxin Chen, Aiping Lu, Chao Liang**

**Table S1. PROTACs and Related Diseases in Academia**

| Name        | Structure | POI | E3 Ligase | Disease<br>(Related Cell Line)                    | Reference |
|-------------|-----------|-----|-----------|---------------------------------------------------|-----------|
| Compound B3 |           | ALK | CRBN      | NSCLC (H3122)                                     | 1         |
| MS4077      |           | ALK | CRBN      | NHL (SU-DHL-1), NSCLC (NCI-H2228)                 | 2         |
| MS4078      |           | ALK | CRBN      | NHL (SU-DHL-1), NSCLC (NCI-H2228)                 | 2         |
| Degradar 17 |           | ALK | CRBN      | NSCLC (A549), Human Fetal Lung Fibroblast (HFL-1) | 3         |

|             |                                                                                     |                                                        |      |                                                                  |   |
|-------------|-------------------------------------------------------------------------------------|--------------------------------------------------------|------|------------------------------------------------------------------|---|
| Compound 2  | 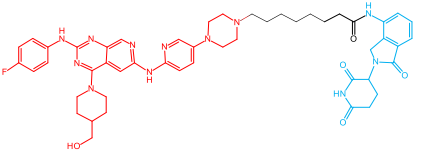  | EGFR <sup>Del19</sup>                                  | CRBN | NSCLC<br>(HCC827)                                                | 4 |
| Compound 10 |   | EGFR <sup>Del19</sup>                                  | VHL  | NSCLC<br>(HCC827)                                                | 4 |
| PROTAC 1    |   | EGFR <sup>Ex20Ins</sup>                                | VHL  | Human Ovarian<br>Carcinoma (OVAR8),<br>Cervical Cancer<br>(HeLa) | 5 |
| PROTACs 3/4 |  | EGFR <sup>Del19</sup> ,<br>EGFR <sup>L858R/T790M</sup> | VHL  | NSCLC<br>(HCC827, H1975)                                         | 5 |

14o

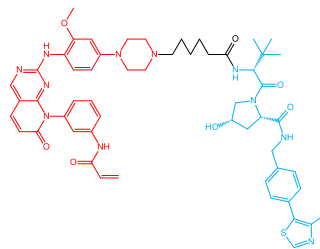

EGFR  
L858R/T790M

VHL

NSCLC (H1975)

6

Compound P3

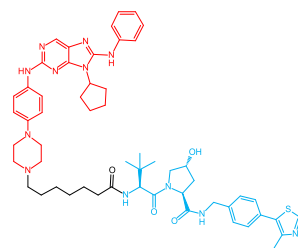

EGFR<sup>Del19</sup>,  
EGFR L858R/T790M

VHL

NSCLC  
(HCC827, H1975)

7

CP17

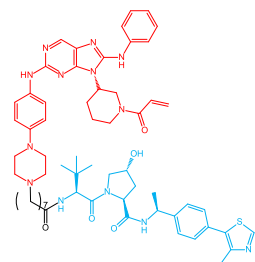

EGFR<sup>Del19</sup>,  
EGFR L858R/T790M

VHL

NSCLC  
(HCC827, H1975)

8

PROTACs-2/5

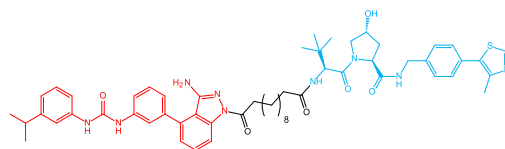

VEGFR-2

VHL

HUVEC  
(EA.hy926)

9

CG416

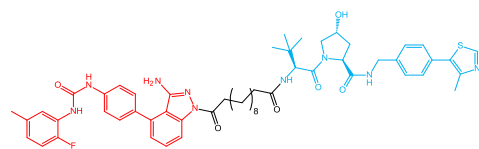

TPM3-TrkA  
Fusion Protein,  
Wild Type TRKA

CRBN

CRC (KM12)

10

CG428

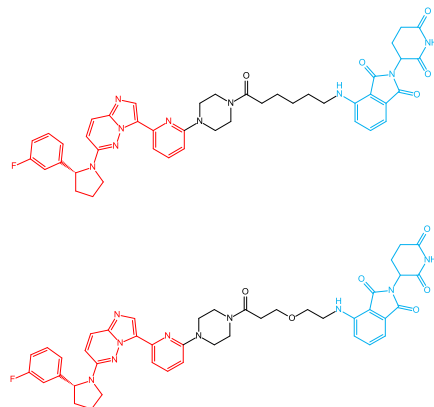

TPM3-TrkA  
fusion protein, Wild  
Type TrkA

CRBN

CRC (KM12)

10

Degrader 4

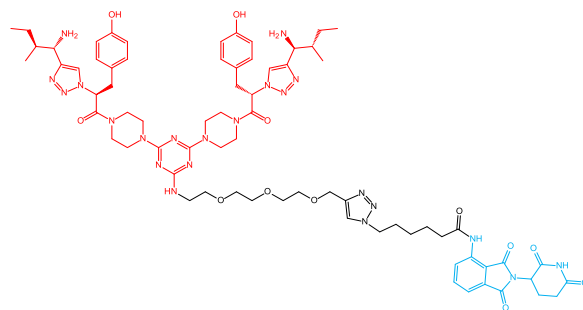

TrkC

CRBN

BC (Hs578t and  
MDA-MB-231)

11

SNIPER(ABL)-  
62

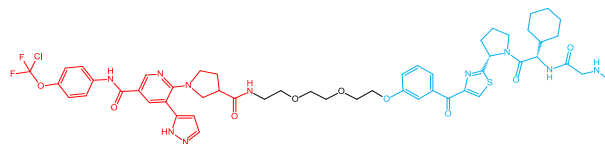

BCR-ABL

clAP1

CML (K562)

12

GMB-475

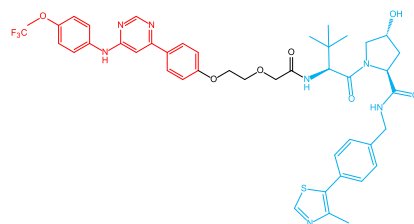

BCR-ABL

VHL

CML (K562)

13

P19P and P22D

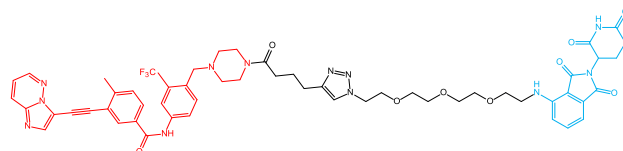

BCR-ABL

CRBN

CML (K562)

14

Degrader 17

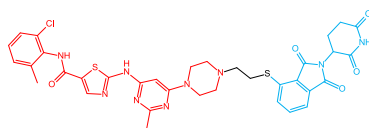

BCR-ABL

CRBN

CML (K562)

15

---

PROTAC-D

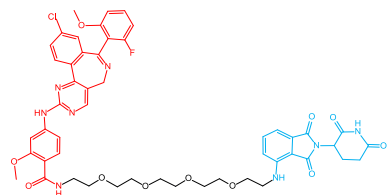

AURKA

CRBN

Osteosarcoma  
(U2OS)

16

JB170

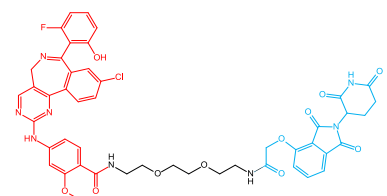

AURKA

CRBN

AML(MV4;11)

17

JB301

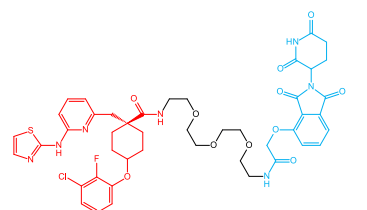

AURKA

CRBN

AML(MV4;11)

18

TL12-186

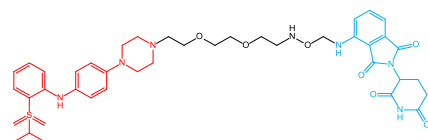

AURKA and  
Other Proteins

CRBN

AML(MOLM14)  
and ALL(MOLT-4)

19

---



XZ424

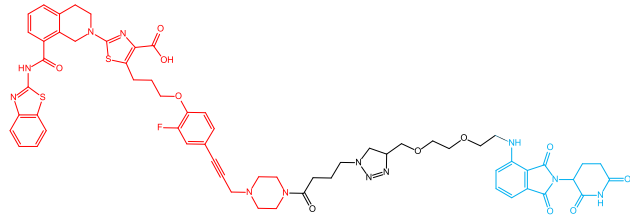

BCL-xL

VHL

ALL(MOLT-4)

20

DT2216

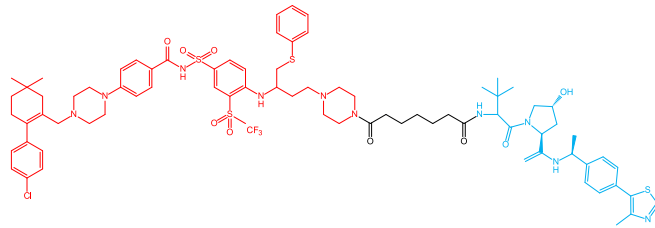

BCL-xL

VHL

ALL(MOLT-4)

21,22

753b

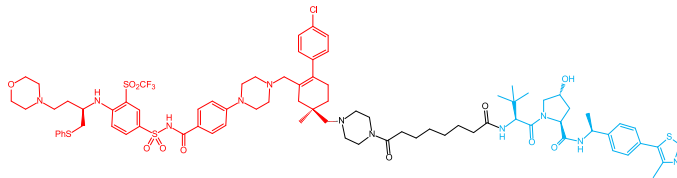

BCL-2/BCL-xL

VHL

AML (Kasumi-1)

23

dMCL 1-2

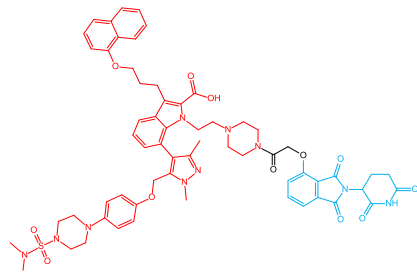

MCL-1

CRBN

MM (OPM2)

24

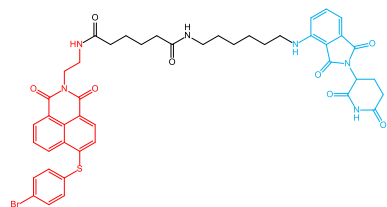

C3/5

MCL-1/BCL-2

CRBN

NSCLC (H23)

25

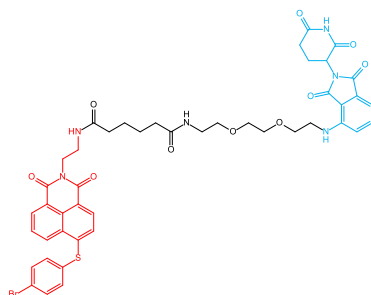

PROTAC (10)

BTK

CRBN

NHL (Ramos)

26

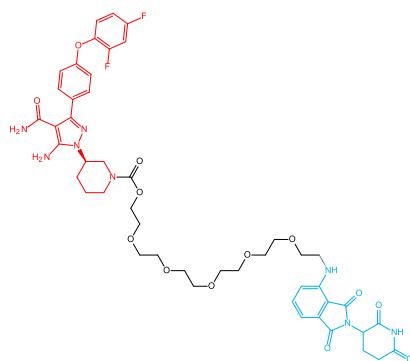

P13I

BTK

CRBN

NHL (Ramos)

27

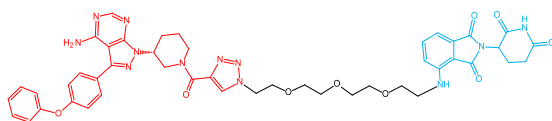

RC32

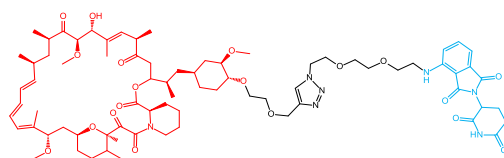

FKBP12

CRBN

28

P13IS

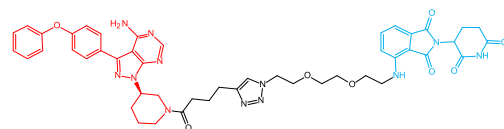

BTK

CRBN

28

NC-1

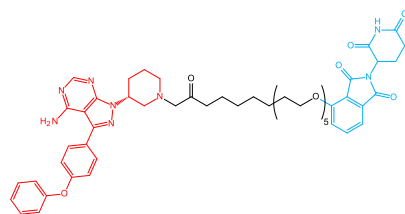

Wild Type BTK  
and BTK<sup>C481S/Y</sup>

CRBN

MCL (Mino),  
Osteosarcoma  
(U2OS), CLL  
(Samples from  
patients)

29

RC-3

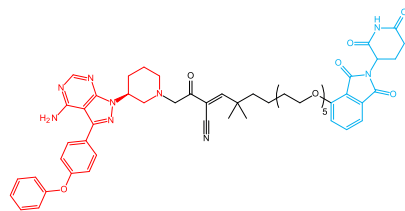

Wild Type BTK  
and BTK<sup>C481S</sup>

CRBN

MCL (Mino),  
Osteosarcoma  
(U2OS), CLL  
(Samples from  
patients)

30

6e

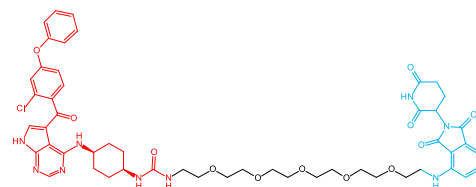

BTK

CRBN

MCL(JeKo-1),  
DLBCL (TMD8)

31

PROTAC-3

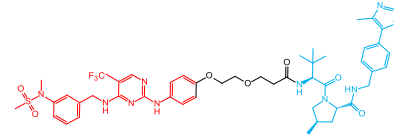

FAK

VHL

PC (PC-3) and  
BC (MDA-MB-231)

32

FC-11

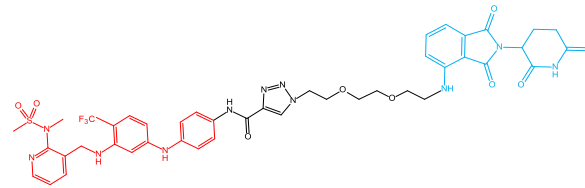

FAK

CRBN

Leydig Cells  
(TM3), Primary  
Sertoli/Germ Cells

33

PROTAC 6/8

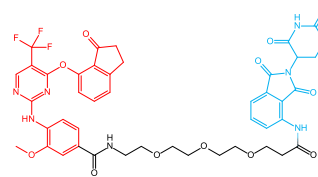

FAK

VHL or CRBN

NSCLC (A549)

34

JP-1 – JP-6

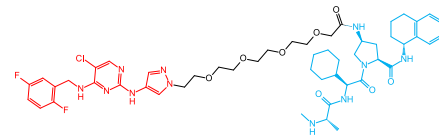

JAK

IAP

AML (THP-1)

35

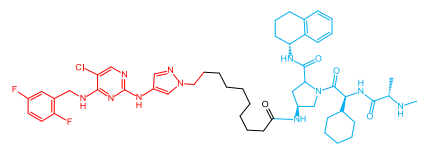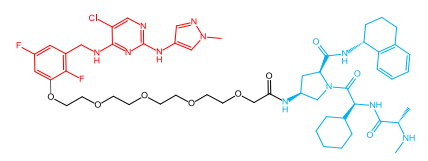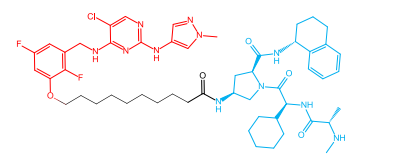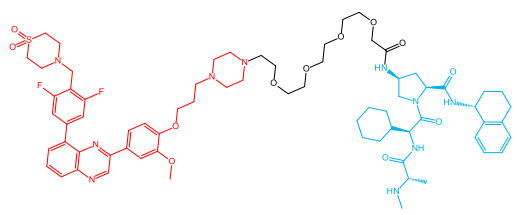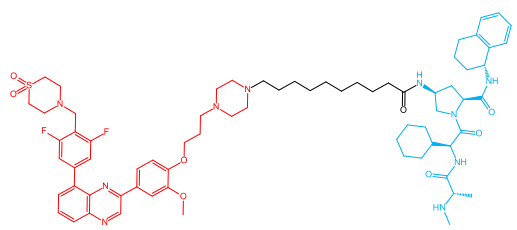

|                    |  |                       |      |                              |    |
|--------------------|--|-----------------------|------|------------------------------|----|
| SHP2-D26           |  | SHP2                  | VHL  | ESCC (KYSE-520), AML(MV4;11) | 36 |
| ZB-S-29            |  | SHP2                  | CRBN | AML(MV4;11)                  | 37 |
| SJF-0628           |  | BRAF<br>mutations     | VHL  | Various Cancers              | 38 |
| P4B                |  | BRAF <sup>V600E</sup> | CRBN | MM (A375)                    | 39 |
| Compounds<br>12/23 |  | BRAF <sup>V600E</sup> | CRBN | MM (A375)                    | 40 |

|          |                                                                                      |                            |      |                                 |    |
|----------|--------------------------------------------------------------------------------------|----------------------------|------|---------------------------------|----|
|          | 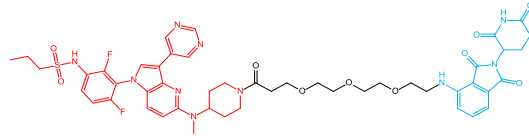   |                            |      |                                 |    |
| TL12-186 |    | CDK                        | CRBN | HEK293                          | 41 |
| Pal-pom  |    | CDK4/6                     | CRBN | BC (MDA-MB-231)                 | 42 |
| CP-10    |    | Wild Type and mutated CDK6 | CRBN | MM (MM.1S)                      | 43 |
| TMX-2172 |   | CDK2/4/5/6/7/9             | CRBN | Human Ovarian Carcinoma (OVAR8) | 44 |
| A9       |  | CDK2                       | CRBN | PC (PC-3)                       | 45 |

F3

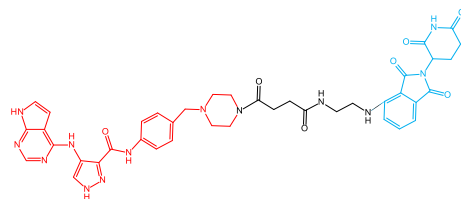

CDK2/9

CRBN

PC (PC-3)

45

BSJ-4-116

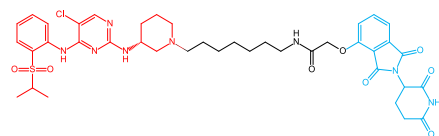

CDK12

CRBN

ALL (Jurkat,  
MOLT-4)

46

PP-C8

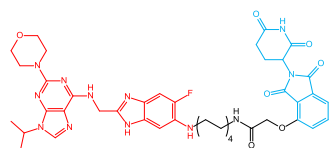

CDK12

CRBN

BC (MDA-MB-  
231), HCC (Bel-  
7402)

47

PROTAC 23

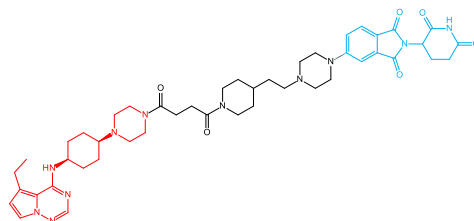

IRAK3

CRBN

AML (THP-1)

48

Degraders 3/5

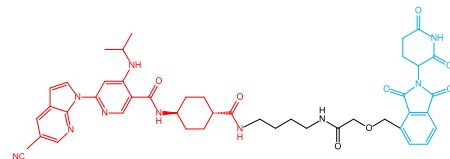

IRAK4

CRBN

AML (THP-1)

49



|            |                                                                                      |       |      |                                |    |
|------------|--------------------------------------------------------------------------------------|-------|------|--------------------------------|----|
| Compound 9 | 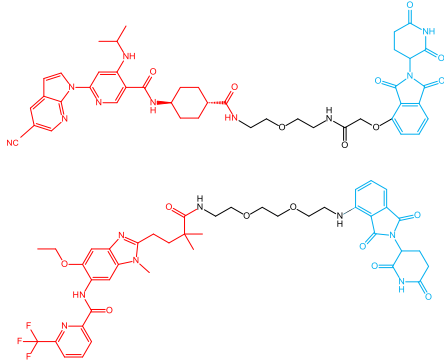   | IRAK4 | CRBN | ABC-DLBCL<br>(OCI-LY10, TMD8)  | 50 |
| Compound 3 |    | MEK   | VHK  | MM (A375)                      | 51 |
| MS423      |    | MEK   | VHL  | CRC(HT29) and<br>MM(SK-MEL-28) | 52 |
| MS934      |  | MEK   | CRBN | CRC(HT29) and<br>MM(SK-MEL-28) | 53 |

SJF $\alpha$  and SJF $\delta$

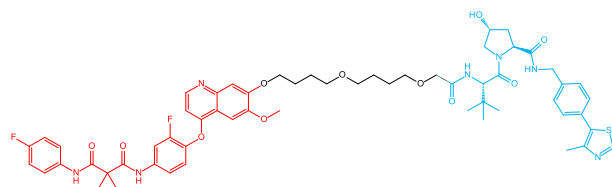

p38 $\alpha$  and p38 $\delta$

VHL

BC (MDA-MB-231)

54

NR-6a and NR-7h

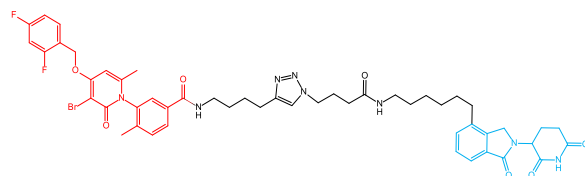

p38 $\alpha$ / $\beta$

CRBN

Various Cancers

55

Compound D

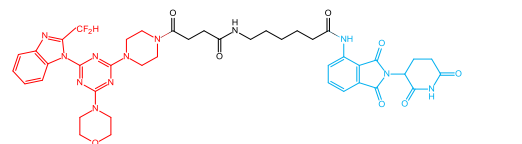

PI3K

CRBN

HCC (HepG2)

56

---

PROTAC\_RIPK2

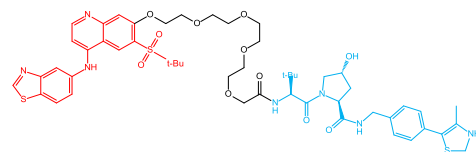

RIPK2

VHL

AML (THP-1)

57

PROTACs 1/2/3

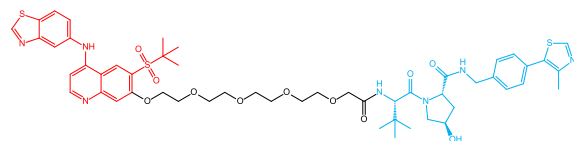

RIPK2

VHL/IAP/CRBN

AML (THP-1)

58

PROTAC 6

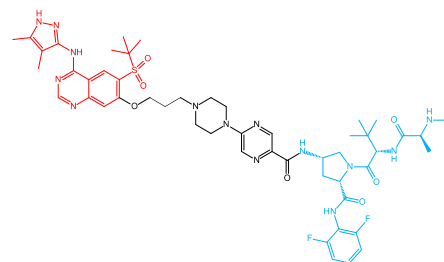

RIPK2

IAP

AML (THP-1)

58

---

SGK3-  
PROTAC1

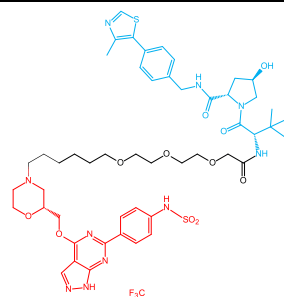

SGK3

VHL

BC (CAMA-1)

59

ARD-266

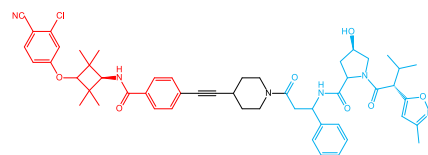

AR

VHL

mCRPC  
(LNCaP, VCaP,  
22Rv1)

60

ARD-69

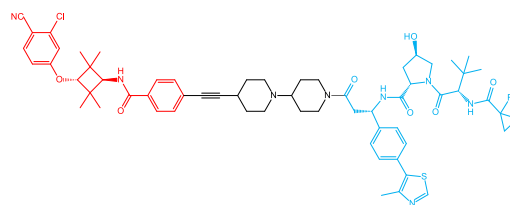

AR

VHL

mCRPC  
(LNCaP, VCaP,  
22Rv1)

61

MTX-23

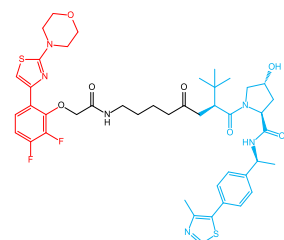

AR

VHL

mCRPC  
(LNCaP, VCaP,  
22Rv1)

62

SNIPER  
Compound 9

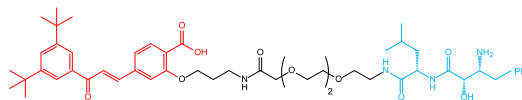

PAR

clAP1

Fibrosarcoma  
(HT1080)

63

Compound  
4a/4b/4c

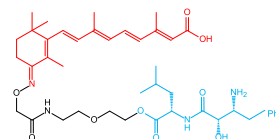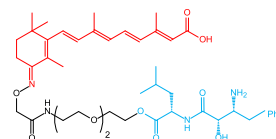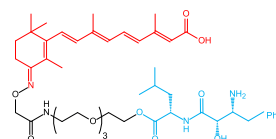

CRABP

clAP1

ALL(MOLT-4),  
Fibrosarcoma  
(HT1080),  
Neuroblastoma  
(IMR-32)

64

ARV-825

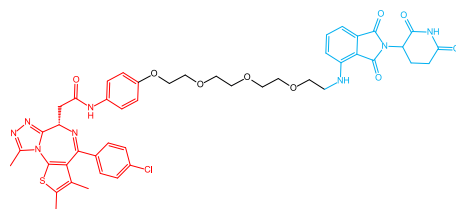

BRD4

CRBN

BL (Namalwa),  
NHL (Ramos)

65

|             |                                                                                     |          |      |                                                  |       |
|-------------|-------------------------------------------------------------------------------------|----------|------|--------------------------------------------------|-------|
| MZ1         | 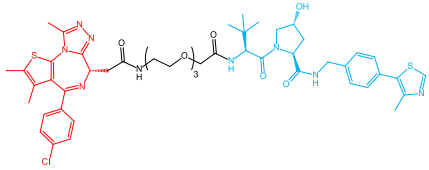  | BRD4     | VHL  | AML(MV4;11)                                      | 66-69 |
| ARV-771     |   | BRD2/3/4 | VHL  | mCRPC<br>(LNCaP95, VCaP,<br>22Rv1)               | 70    |
| dBET1       |   | BRD4     | CRBN | AML(MV4;11)                                      | 71    |
| 15a         |  | BRD4     | VHL  | AML(MV4;11),<br>NSCLC (A549)                     | 72    |
| SIAIS213110 |  | BRD2/3/4 | CRBN | MM (MM.1S),<br>AML(MV4;11), TNBC<br>(MDA-MB-468) | 73    |

|                     |                                                                                     |          |      |                                             |    |
|---------------------|-------------------------------------------------------------------------------------|----------|------|---------------------------------------------|----|
| QCA570              | 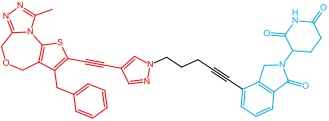  | BRD2/3/4 | CRBN | ALL (RS4;11),<br>AML(MV4;11)                | 74 |
| BETd-<br>260/ZBC260 |   | BRD2/3/4 | CRBN | ALL (RS4;11)                                | 75 |
| VZ185               |   | BRD7/9   | VHL  | AML (EOL-1),<br>Rhabdomyosarcoma<br>(A-204) | 76 |
| dBRD9               |  | BRD9     | CRBN | AML (EOL-1),<br>ALL (MOLM-13)               | 77 |
| GSK983              |  | PCAF     | CRBN | AML (THP-1)                                 | 78 |

PROTAC 4

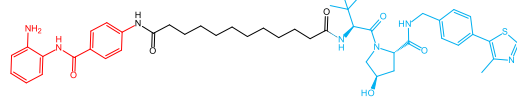

HDAC1/2/3

VHL

E14 mESCs,  
CRC (HCT-116)

79

HD-TAC1

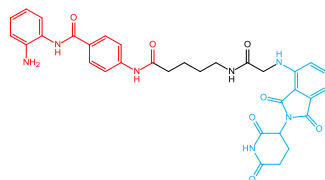

HDAC3

CRBN

Macrophage  
(RAW 264.7)

80

HD-TAC7

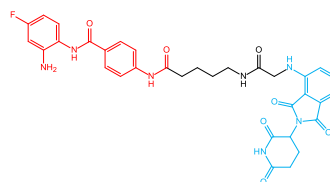

HDAC3

CRBN

Macrophage  
(RAW 264.7)

80

XZ9002

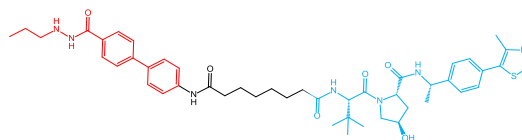

HDAC3

VHL

TNBC (MDA-  
MB-468)

81

WH624, YZ268

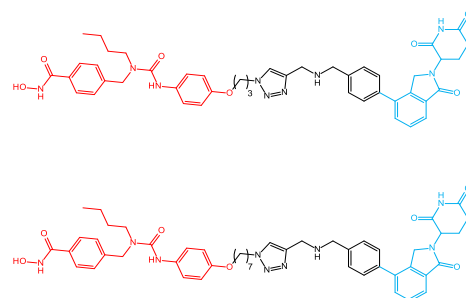

HDAC6

CRBN

MM (MM.1S)

82



|             |                                                                                      |        |      |                                           |    |
|-------------|--------------------------------------------------------------------------------------|--------|------|-------------------------------------------|----|
| Compound 3j | 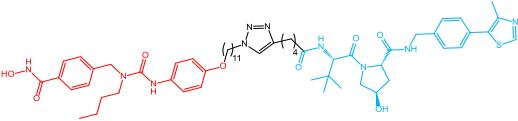   | HDAC6  | VHL  | MM (MM.1S)<br>and Mouse 4935 Cell<br>Line | 83 |
| 12d         |     | HDAC6  | CRBN | MM (MM.1S)                                | 84 |
| NP8         |     | HDAC6  | CRBN | MM (MM.1S)                                | 85 |
| dTRIM24     |   | TRIM24 | VHL  | ALL (MOLM-13)                             | 86 |
| UNC6852     |  | PRC2   | VHL  | DLBCL (DB,<br>Pfeiffer)                   | 87 |

---

PROTAC 1/2

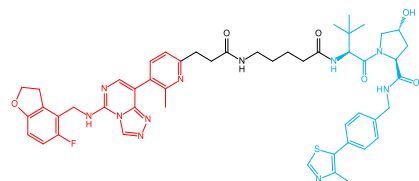

PRC2

VHL

NHL (Karpas-422)

88

SD-36

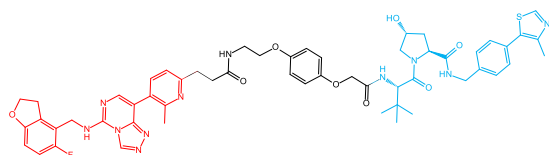

STAT3

CRBN

AML (MOLM-16)

89

TM-P4-Thal

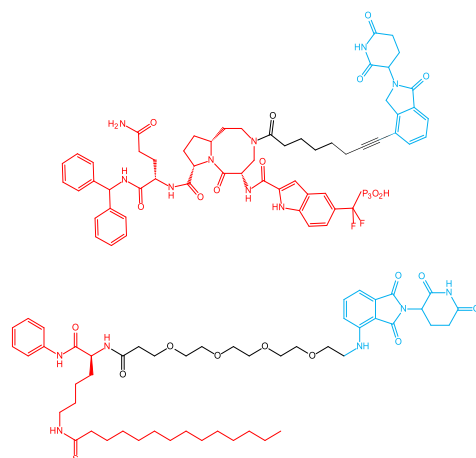

SIRT2

CRBN

BC (MCF-7, BT-549)

90

Compound 12

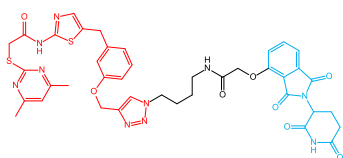

SIRT2

CRBN

Cervical Cancer (HeLa)

91

---

Compound 3

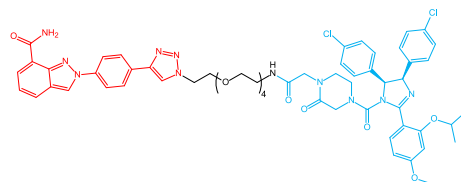

PARP-1

CRBN

BC (MDA-MB-231)

92

iRucaparib-AP6

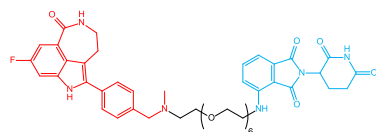

PARP-1

CRBN

Mouse C2C12 Myotubes

93

Degrader SK575

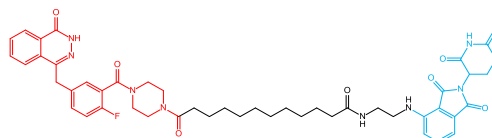

PARP-1

CRBN

CRC (SW620)

94

CN0

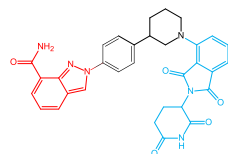

PARP-1

CRBN

BC (MDA-MB-231)

95

P22

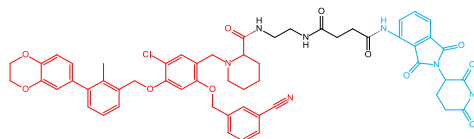

PD-L1

CRBN

BC (MDA-MB-231)

96

Compound 15

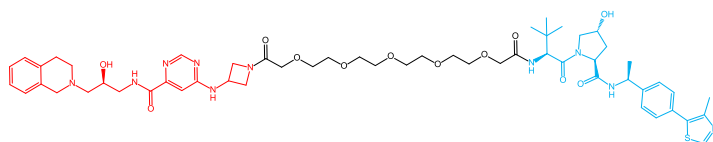

PRMT5

VHL

BC (MCF-7)

97

---

ACBI1

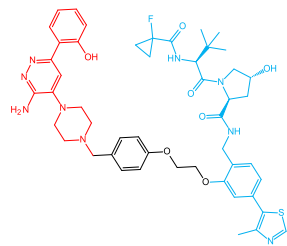

SMARCA2/4,  
PBRM1

VHL

AML (MV4;11),  
NSCLC (H1568)

98

XY-4-88

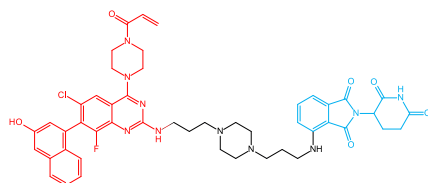

KRASG12C

CRBN

Pancreatic  
Cancer (Paca-2),  
NSCLC (H358)

99

LC-2

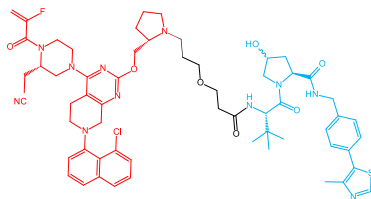

KRASG12C

VHL

NSCLC (H2030,  
H23), Pancreatic  
Cancer (Paca-2)

100

YF135

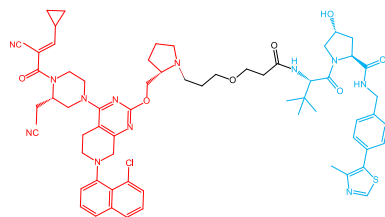

KRAS

VHL

NSCLC (H358,  
A549, H23)

101

---

|           |                                                                                      |        |      |                                                               |     |
|-----------|--------------------------------------------------------------------------------------|--------|------|---------------------------------------------------------------|-----|
| 9d        | 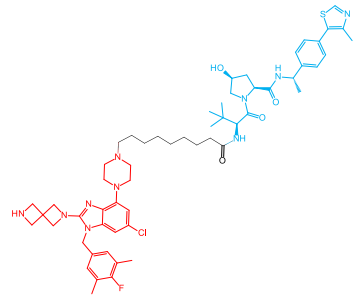   | SOS1   | VHL  | NSCLC (H358)                                                  | 102 |
| CM11      |    | pVHL30 | VHL  | Cervical Cancer (HeLa), Osteosarcoma (U2OS)                   | 103 |
| WL40      |    | Rpn13  | CRBN | MM (MM.1S)                                                    | 104 |
| QC-01-175 |   | Tau    | CRBN | Patient-Derived Frontotemporal Dementia Neuronal Cells (A25T) | 105 |
| d9A2      |  | SCL9   | CRBN | CML (HAP1, KBM7)                                              | 106 |

---

MD-224

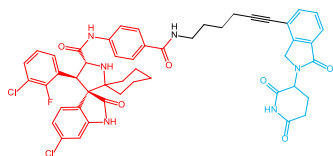

TP53

CRBN

ALL (RS4;11)

107

PROTAC 32

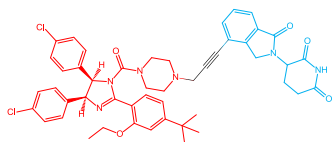

MDM2

CRBN

ALL (RS4;11)

108

DGY-08-097

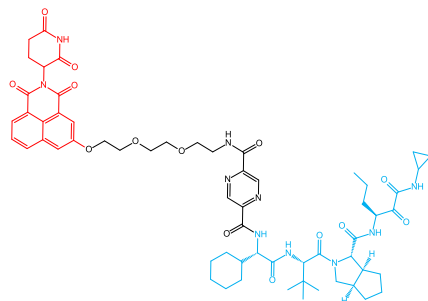

NS3

CRBN

Huh7.5 Cells  
Infected with Wild  
Type HCV-Jc1

109

PROTACs 3/5

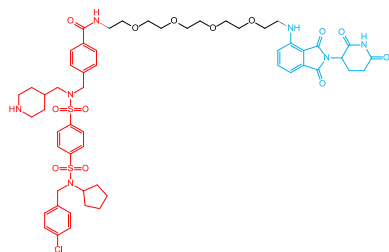

PDEδ

CRBN

ALL (Jurkat)

110

---

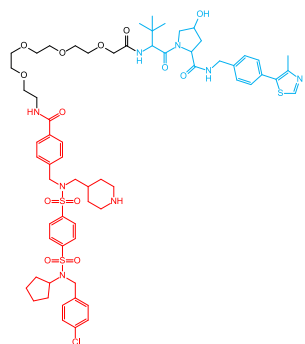

Compound 17f

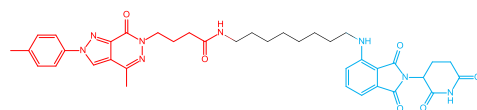

PDE $\delta$

CRBN

CRC (SW480)

111

---

ABC-DLBCL, activated B cell-like diffuse large B-cell lymphoma; ALL, acute lymphocytic leukemia; AML, acute myeloid leukemia; BC, breast cancer; BL, Burkitt lymphoma; mESCs, mouse embryonic stem cells; CLL, chronic lymphocytic leukemia; CML, chronic myelogenous leukemia; CRC, colorectal cancer; DLBCL, diffuse large B-cell lymphoma; ESCC, esophageal squamous cell carcinoma; HCC, hepatocellular carcinoma; HUVECs, human umbilical vein endothelial cells; MCL, mantle cell lymphoma, mCRPC, metastatic castration-resistant prostate cancer; MM, multiple myeloma; NHL, non-Hodgkin's lymphoma; NSCLC, non-small-cell Lung cancer; PC, prostate cancer; TNBC, triple-negative breast cancer.

## References

1. Yan, G., Zhong, X., Yue, L., et al. (2021). Discovery of a PROTAC targeting ALK with in vivo activity. *European Journal of Medicinal Chemistry* **212**, 113150.
2. Zhang, C., Han, X.-R., Yang, X., et al. (2018). Proteolysis Targeting Chimeras (PROTACs) of Anaplastic Lymphoma Kinase (ALK). *European journal of medicinal chemistry* **151**, 304-314.
3. Xie, S., Sun, Y., Liu, Y., et al. (2021). Development of Alectinib-Based PROTACs as Novel Potent Degradors of Anaplastic Lymphoma Kinase (ALK). *Journal of Medicinal Chemistry* **64**, 9120-9140.
4. Zhang, H., Zhao, H.-Y., Xi, X.-X., et al. (2020). Discovery of potent epidermal growth factor receptor (EGFR) degraders by proteolysis targeting chimera (PROTAC). *European Journal of Medicinal Chemistry* **189**, 112061.
5. Burslem, G.M., Smith, B.E., Lai, A.C., et al. (2018). The Advantages of Targeted Protein Degradation Over Inhibition: An RTK Case Study. *Cell Chemical Biology* **25**, 67-77.e63.
6. Zhang, X., Xu, F., Tong, L., et al. (2020). Design and synthesis of selective degraders of EGFR L858R/T790M mutant. *European Journal of Medicinal Chemistry* **192**, 112199.
7. Zhao, H.-Y., Yang, X.-Y., Lei, H., et al. (2020). Discovery of potent small molecule PROTACs targeting mutant EGFR. *European Journal of Medicinal Chemistry* **208**, 112781.
8. Zhao, H.-Y., Wang, H.-P., Mao, Y.-Z., et al. (2022). Discovery of Potent PROTACs Targeting EGFR Mutants through the Optimization of Covalent EGFR Ligands. *Journal of Medicinal Chemistry* **65**, 4709-4726.
9. Shan, Y., Si, R., Wang, J., et al. (2020). Discovery of novel anti-angiogenesis agents. Part 11: Development of PROTACs based on active molecules with potency of promoting vascular normalization. *European Journal of Medicinal Chemistry* **205**, 112654.
10. Chen, L., Chen, Y., Zhang, C., et al. (2020). Discovery of First-In-Class Potent and Selective Tropomyosin Receptor Kinase Degradors. *Journal of Medicinal Chemistry* **63**, 14562-14575.
11. Zhao, B., and Burgess, K. (2019). TrkC-Targeted Kinase Inhibitors And PROTACs. *Molecular Pharmaceutics* **16**, 4313-4318.
12. Shimokawa, K., Shibata, N., Sameshima, T., et al. (2017). Targeting the Allosteric Site of Oncoprotein BCR-ABL as an Alternative Strategy for Effective Target Protein Degradation. *ACS medicinal chemistry letters* **8**, 1042-1047.
13. Burslem, G.M., Schultz, A.R., Bondeson, D.P., et al. (2019). Targeting BCR-ABL1 in Chronic Myeloid Leukemia by PROTAC-Mediated Targeted Protein Degradation. *Cancer Research* **79**, 4744-4753.



14. Yang, Y., Gao, H., Sun, X., et al. (2020). Global PROTAC Toolbox for Degrading BCR–ABL Overcomes Drug-Resistant Mutants and Adverse Effects. *Journal of Medicinal Chemistry* **63**, 8567-8583.
15. Liu, H., Ding, X., Liu, L., et al. (2021). Discovery of novel BCR-ABL PROTACs based on the cereblon E3 ligase design, synthesis, and biological evaluation. *European Journal of Medicinal Chemistry* **223**, 113645.
16. Wang, R., Ascanelli, C., Abdelbaki, A., et al. (2021). Selective targeting of non-centrosomal AURKA functions through use of a targeted protein degradation tool. *Communications Biology* **4**, 640.
17. Adhikari, B., Bozilovic, J., Diebold, M., et al. (2020). PROTAC-mediated degradation reveals a non-catalytic function of AURORA-A kinase. *Nature Chemical Biology* **16**, 1179-1188.
18. Bozilovic, J., Eing, L., Berger, B.-T., et al. (2022). Novel, highly potent PROTACs targeting AURORA-A kinase. *Current Research in Chemical Biology* **2**, 100032.
19. Huang, H.-T., Dobrovolsky, D., Paulk, J., et al. (2018). A Chemoproteomic Approach to Query the Degradable Kinome Using a Multi-kinase Degradator. *Cell chemical biology* **25**, 88-99.e86.
20. Zhang, X., Thummuri, D., He, Y., et al. (2019). Utilizing PROTAC technology to address the on-target platelet toxicity associated with inhibition of BCL-X(L). *Chem Commun (Camb)* **55**, 14765-14768.
21. Khan, S., Zhang, X., Lv, D., et al. (2019). A selective BCL-XL PROTAC degrader achieves safe and potent antitumor activity. *Nature Medicine* **25**, 1938-1947.
22. Pal, P., Thummuri, D., Lv, D., et al. (2021). Discovery of a Novel BCL-XL PROTAC Degradator with Enhanced BCL-2 Inhibition. *Journal of Medicinal Chemistry* **64**, 14230-14246.
23. Lv, D., Pal, P., Liu, X., et al. (2021). Development of a BCL-xL and BCL-2 dual degrader with improved anti-leukemic activity. *Nature Communications* **12**, 6896.
24. Papatzimas, J.W., Gorobets, E., Maity, R., et al. (2019). From Inhibition to Degradation: Targeting the Antiapoptotic Protein Myeloid Cell Leukemia 1 (MCL1). *Journal of Medicinal Chemistry* **62**, 5522-5540.
25. Wang, Z., He, N., Guo, Z., et al. (2019). Proteolysis Targeting Chimeras for the Selective Degradation of Mcl-1/Bcl-2 Derived from Nonselective Target Binding Ligands. *Journal of Medicinal Chemistry* **62**, 8152-8163.
26. Zorba, A., Nguyen, C., Xu, Y., et al. (2018). Delineating the role of cooperativity in the design of potent PROTACs for BTK. *Proceedings of the National Academy of Sciences* **115**, E7285-E7292.
27. Sun, Y., Zhao, X., Ding, N., et al. (2018). PROTAC-induced BTK degradation as a novel therapy for mutated BTK C481S induced

- ibrutinib-resistant B-cell malignancies. *Cell Res* **28**, 779-781.
28. Sun, X., Wang, J., Yao, X., et al. (2019). A chemical approach for global protein knockdown from mice to non-human primates. *Cell Discov* **5**, 10.
  29. Shorer Arbel, Y., Katz, B.-Z., Gabizon, R., et al. (2021). Proteolysis Targeting Chimeras for BTK Efficiently Inhibit B-Cell Receptor Signaling and Can Overcome Ibrutinib Resistance in CLL Cells. *Frontiers in Oncology* **11**.
  30. Gabizon, R., Shraga, A., Gehrtz, P., et al. (2020). Efficient Targeted Degradation via Reversible and Irreversible Covalent PROTACs. *Journal of the American Chemical Society* **142**, 11734-11742.
  31. Zhao, Y., Shu, Y., Lin, J., et al. (2021). Discovery of novel BTK PROTACs for B-Cell lymphomas. *European Journal of Medicinal Chemistry* **225**, 113820.
  32. Cromm, P.M., Samarasinghe, K.T.G., Hines, J., and Crews, C.M. (2018). Addressing Kinase-Independent Functions of Fak via PROTAC-Mediated Degradation. *Journal of the American Chemical Society* **140**, 17019-17026.
  33. Gao, H., Zheng, C., Du, J., et al. (2020). FAK-targeting PROTAC as a chemical tool for the investigation of non-enzymatic FAK function in mice. *Protein Cell* **11**, 534-539.
  34. Popow, J., Arnhof, H., Bader, G., et al. (2019). Highly Selective PTK2 Proteolysis Targeting Chimeras to Probe Focal Adhesion Kinase Scaffolding Functions. *Journal of Medicinal Chemistry* **62**, 2508-2520.
  35. Shah, R.R., Redmond, J.M., Mihut, A., et al. (2020). Hi-JAK-ing the ubiquitin system: The design and physicochemical optimisation of JAK PROTACs. *Bioorganic & Medicinal Chemistry* **28**, 115326.
  36. Wang, M., Lu, J., Wang, M., et al. (2020). Discovery of SHP2-D26 as a First, Potent, and Effective PROTAC Degradation of SHP2 Protein. *Journal of Medicinal Chemistry* **63**, 7510-7528.
  37. Yang, X., Wang, Z., Pei, Y., et al. (2021). Discovery of thalidomide-based PROTAC small molecules as the highly efficient SHP2 degraders. *European Journal of Medicinal Chemistry* **218**, 113341.
  38. Alabi, S., Jaime-Figueroa, S., Yao, Z., et al. (2021). Mutant-selective degradation by BRAF-targeting PROTACs. *Nature Communications* **12**, 920.
  39. Posternak, G., Tang, X., Maisonneuve, P., et al. (2020). Functional characterization of a PROTAC directed against BRAF mutant V600E. *Nature Chemical Biology* **16**, 1170-1178.
  40. Han, X.-R., Chen, L., Wei, Y., et al. (2020). Discovery of Selective Small Molecule Degradation of BRAF-V600E. *Journal of Medicinal Chemistry* **63**, 4069-4080.
  41. Riching, K.M., Schwinn, M.K., Vasta, J.D., et al. (2020). CDK Family

- PROTAC Profiling Reveals Distinct Kinetic Responses and Cell Cycle-Dependent Degradation of CDK2. *SLAS DISCOVERY: Advancing the Science of Drug Discovery* **26**, 560-569.
42. Zhao, B., and Burgess, K. (2019). PROTACs suppression of CDK4/6, crucial kinases for cell cycle regulation in cancer. *Chemical Communications* **55**, 2704-2707.
  43. Su, S., Yang, Z., Gao, H., et al. (2019). Potent and Preferential Degradation of CDK6 via Proteolysis Targeting Chimera Degraders. *Journal of medicinal chemistry* **62**, 7575-7582.
  44. Teng, M., Jiang, J., He, Z., et al. (2020). Development of CDK2 and CDK5 Dual Degradator TMX-2172. *Angewandte Chemie International Edition* **59**, 13865-13870.
  45. Zhou, F., Chen, L., Cao, C., et al. (2020). Development of selective mono or dual PROTAC degrader probe of CDK isoforms. *European Journal of Medicinal Chemistry* **187**, 111952.
  46. Jiang, B., Gao, Y., Che, J., et al. (2021). Discovery and resistance mechanism of a selective CDK12 degrader. *Nature Chemical Biology* **17**, 675-683.
  47. Niu, T., Li, K., Jiang, L., et al. (2022). Noncovalent CDK12/13 dual inhibitors-based PROTACs degrade CDK12-Cyclin K complex and induce synthetic lethality with PARP inhibitor. *European Journal of Medicinal Chemistry* **228**, 114012.
  48. Degorce, S.L., Tavana, O., Banks, E., et al. (2020). Discovery of Proteolysis-Targeting Chimera Molecules that Selectively Degrade the IRAK3 Pseudokinase. *Journal of Medicinal Chemistry* **63**, 10460-10473.
  49. Zhang, J., Fu, L., Shen, B., et al. (2020). Assessing IRAK4 Functions in ABC DLBCL by IRAK4 Kinase Inhibition and Protein Degradation. *Cell Chemical Biology* **27**, 1500-1509.e1513.
  50. Chen, Y., Ning, Y., Bai, G., et al. (2021). Design, Synthesis, and Biological Evaluation of IRAK4-Targeting PROTACs. *ACS Medicinal Chemistry Letters* **12**, 82-87.
  51. Vollmer, S., Cunoosamy, D., Lv, H., et al. (2020). Design, Synthesis, and Biological Evaluation of MEK PROTACs. *Journal of Medicinal Chemistry* **63**, 157-162.
  52. Wei, J., Hu, J., Wang, L., et al. (2019). Discovery of a First-in-Class Mitogen-Activated Protein Kinase Kinase 1/2 Degradator. *Journal of Medicinal Chemistry* **62**, 10897-10911.
  53. Hu, J., Wei, J., Yim, H., et al. (2020). Potent and Selective Mitogen-Activated Protein Kinase Kinase 1/2 (MEK1/2) Heterobifunctional Small-molecule Degradators. *Journal of Medicinal Chemistry* **63**, 15883-15905.
  54. Smith, B.E., Wang, S.L., Jaime-Figueroa, S., et al. (2019). Differential PROTAC substrate specificity dictated by orientation of recruited E3

- ligase. *Nature Communications* **10**, 131.
55. Donoghue, C., Cubillos-Rojas, M., Gutierrez-Prat, N., et al. (2020). Optimal linker length for small molecule PROTACs that selectively target p38 $\alpha$  and p38 $\beta$  for degradation. *European Journal of Medicinal Chemistry* **201**, 112451.
  56. Li, W., Gao, C., Zhao, L., et al. (2018). Phthalimide conjugations for the degradation of oncogenic PI3K. *European Journal of Medicinal Chemistry* **151**, 237-247.
  57. Bondeson, D.P., Mares, A., Smith, I.E.D., et al. (2015). Catalytic in vivo protein knockdown by small-molecule PROTACs. *Nature Chemical Biology* **11**, 611-617.
  58. Mares, A., Miah, A.H., Smith, I.E.D., et al. (2020). Extended pharmacodynamic responses observed upon PROTAC-mediated degradation of RIPK2. *Communications Biology* **3**, 140.
  59. Tovell, H., Testa, A., Zhou, H., et al. (2019). Design and Characterization of SGK3-PROTAC1, an Isoform Specific SGK3 Kinase PROTAC Degradator. *ACS Chemical Biology* **14**, 2024-2034.
  60. Han, X., Zhao, L., Xiang, W., et al. (2019). Discovery of Highly Potent and Efficient PROTAC Degradators of Androgen Receptor (AR) by Employing Weak Binding Affinity VHL E3 Ligase Ligands. *Journal of Medicinal Chemistry* **62**, 11218-11231.
  61. Han, X., Wang, C., Qin, C., et al. (2019). Discovery of ARD-69 as a Highly Potent Proteolysis Targeting Chimera (PROTAC) Degradator of Androgen Receptor (AR) for the Treatment of Prostate Cancer. *Journal of Medicinal Chemistry* **62**, 941-964.
  62. Lee, G.T., Nagaya, N., Desantis, J., et al. (2021). Effects of MTX-23, a Novel PROTAC of Androgen Receptor Splice Variant-7 and Androgen Receptor, on CRPC Resistant to Second-Line Antiandrogen Therapy. *Molecular Cancer Therapeutics* **20**, 490-499.
  63. Itoh, Y., Kitaguchi, R., Ishikawa, M., et al. (2011). Design, synthesis and biological evaluation of nuclear receptor-degradation inducers. *Bioorganic & Medicinal Chemistry* **19**, 6768-6778.
  64. Itoh, Y., Ishikawa, M., Naito, M., and Hashimoto, Y. (2010). Protein knockdown using methyl bestatin-ligand hybrid molecules: design and synthesis of inducers of ubiquitination-mediated degradation of cellular retinoic acid-binding proteins. *J Am Chem Soc* **132**, 5820-5826.
  65. Lu, J., Qian, Y., Altieri, M., et al. (2015). Hijacking the E3 Ubiquitin Ligase Cereblon to Efficiently Target BRD4. *Chemistry & Biology* **22**, 755-763.
  66. Zengerle, M., Chan, K.-H., and Ciulli, A. (2015). Selective Small Molecule Induced Degradation of the BET Bromodomain Protein BRD4. *ACS Chemical Biology* **10**, 1770-1777.
  67. Chan, K.-H., Zengerle, M., Testa, A., and Ciulli, A. (2018). Impact of

- Target Warhead and Linkage Vector on Inducing Protein Degradation: Comparison of Bromodomain and Extra-Terminal (BET) Degraders Derived from Triazolodiazepine (JQ1) and Tetrahydroquinoline (I-BET726) BET Inhibitor Scaffolds. *Journal of Medicinal Chemistry* **61**, 504-513.
68. Gadd, M.S., Testa, A., Lucas, X., et al. (2017). Structural basis of PROTAC cooperative recognition for selective protein degradation. *Nature Chemical Biology* **13**, 514-521.
  69. Roy, M.J., Winkler, S., Hughes, S.J., et al. (2019). SPR-Measured Dissociation Kinetics of PROTAC Ternary Complexes Influence Target Degradation Rate. *ACS Chemical Biology* **14**, 361-368.
  70. Raina, K., Lu, J., Qian, Y., et al. (2016). PROTAC-induced BET protein degradation as a therapy for castration-resistant prostate cancer. *Proceedings of the National Academy of Sciences* **113**, 7124-7129.
  71. Winter Georg, E., Buckley Dennis, L., Paulk, J., et al. (2015). Phthalimide conjugation as a strategy for in vivo target protein degradation. *Science* **348**, 1376-1381.
  72. Testa, A., Lucas, X., Castro, G.V., et al. (2018). 3-Fluoro-4-hydroxyprolines: Synthesis, Conformational Analysis, and Stereoselective Recognition by the VHL E3 Ubiquitin Ligase for Targeted Protein Degradation. *Journal of the American Chemical Society* **140**, 9299-9313.
  73. Qiu, X., Sun, N., Kong, Y., et al. (2019). Chemoselective Synthesis of Lenalidomide-Based PROTAC Library Using Alkylation Reaction. *Organic Letters* **21**, 3838-3841.
  74. Qin, C., Hu, Y., Zhou, B., et al. (2018). Discovery of QCA570 as an Exceptionally Potent and Efficacious Proteolysis Targeting Chimera (PROTAC) Degradator of the Bromodomain and Extra-Terminal (BET) Proteins Capable of Inducing Complete and Durable Tumor Regression. *Journal of Medicinal Chemistry* **61**, 6685-6704.
  75. Zhou, B., Hu, J., Xu, F., et al. (2018). Discovery of a Small-Molecule Degradator of Bromodomain and Extra-Terminal (BET) Proteins with Picomolar Cellular Potencies and Capable of Achieving Tumor Regression. *Journal of Medicinal Chemistry* **61**, 462-481.
  76. Zoppi, V., Hughes, S.J., Maniaci, C., et al. (2019). Iterative Design and Optimization of Initially Inactive Proteolysis Targeting Chimeras (PROTACs) Identify VZ185 as a Potent, Fast, and Selective von Hippel-Lindau (VHL) Based Dual Degradator Probe of BRD9 and BRD7. *Journal of Medicinal Chemistry* **62**, 699-726.
  77. Remillard, D., Buckley, D.L., Paulk, J., et al. (2017). Degradation of the BAF Complex Factor BRD9 by Heterobifunctional Ligands. *Angewandte Chemie International Edition* **56**, 5738-5743.

78. Bassi, Z.I., Fillmore, M.C., Miah, A.H., et al. (2018). Modulating PCAF/GCN5 Immune Cell Function through a PROTAC Approach. *ACS Chemical Biology* **13**, 2862-2867.
79. Smalley, J.P., Adams, G.E., Millard, C.J., et al. (2020). PROTAC-mediated degradation of class I histone deacetylase enzymes in corepressor complexes. *Chemical Communications* **56**, 4476-4479.
80. Cao, F., de Weerd, S., Chen, D., et al. (2020). Induced protein degradation of histone deacetylases 3 (HDAC3) by proteolysis targeting chimera (PROTAC). *European Journal of Medicinal Chemistry* **208**, 112800.
81. Xiao, Y., Wang, J., Zhao, L.Y., et al. (2020). Discovery of histone deacetylase 3 (HDAC3)-specific PROTACs. *Chemical Communications* **56**, 9866-9869.
82. Yang, K., Zhao, Y., Nie, X., et al. (2020). A Cell-Based Target Engagement Assay for the Identification of Cereblon E3 Ubiquitin Ligase Ligands and Their Application in HDAC6 Degraders. *Cell Chemical Biology* **27**, 866-876.e868.
83. Yang, K., Wu, H., Zhang, Z., et al. (2020). Development of Selective Histone Deacetylase 6 (HDAC6) Degraders Recruiting Von Hippel–Lindau (VHL) E3 Ubiquitin Ligase. *ACS Medicinal Chemistry Letters* **11**, 575-581.
84. Wu, H., Yang, K., Zhang, Z., et al. (2019). Development of Multifunctional Histone Deacetylase 6 Degraders with Potent Antimyeloma Activity. *Journal of Medicinal Chemistry* **62**, 7042-7057.
85. An, Z., Lv, W., Su, S., et al. (2019). Developing potent PROTACs tools for selective degradation of HDAC6 protein. *Protein & Cell* **10**, 606-609.
86. Gchijian, L.N., Buckley, D.L., Lawlor, M.A., et al. (2018). Functional TRIM24 degrader via conjugation of ineffectual bromodomain and VHL ligands. *Nature Chemical Biology* **14**, 405-412.
87. Potjewyd, F., Turner, A.-M.W., Beri, J., et al. (2020). Degradation of Polycomb Repressive Complex 2 with an EED-Targeted Bivalent Chemical Degradation. *Cell Chemical Biology* **27**, 47-56.e15.
88. Hsu, J.H.-R., Rasmusson, T., Robinson, J., et al. (2020). EED-Targeted PROTACs Degrade EED, EZH2, and SUZ12 in the PRC2 Complex. *Cell Chemical Biology* **27**, 41-46.e17.
89. Zhou, H., Bai, L., Xu, R., et al. (2019). Structure-Based Discovery of SD-36 as a Potent, Selective, and Efficacious PROTAC Degradation of STAT3 Protein. *Journal of Medicinal Chemistry* **62**, 11280-11300.
90. Hong, J.Y., Jing, H., Price, I.R., et al. (2020). Simultaneous Inhibition of SIRT2 Deacetylase and Defatty-Acylase Activities via a PROTAC Strategy. *ACS Medicinal Chemistry Letters* **11**, 2305-2311.
91. Schiedel, M., Herp, D., Hammelmann, S., et al. (2018). Chemically

- Induced Degradation of Sirtuin 2 (Sirt2) by a Proteolysis Targeting Chimera (PROTAC) Based on Sirtuin Rearranging Ligands (SirReals). *Journal of Medicinal Chemistry* **61**, 482-491.
92. Zhao, Q., Lan, T., Su, S., and Rao, Y. (2019). Induction of apoptosis in MDA-MB-231 breast cancer cells by a PARP1-targeting PROTAC small molecule. *Chemical Communications* **55**, 369-372.
  93. Wang, S., Han, L., Han, J., et al. (2019). Uncoupling of PARP1 trapping and inhibition using selective PARP1 degradation. *Nature Chemical Biology* **15**, 1223-1231.
  94. Cao, C., Yang, J., Chen, Y., et al. (2020). Discovery of SK-575 as a Highly Potent and Efficacious Proteolysis-Targeting Chimera Degradator of PARP1 for Treating Cancers. *Journal of Medicinal Chemistry* **63**, 11012-11033.
  95. Lin, S., Tu, G., Yu, Z., et al. (2022). Discovery of CN0 as a novel proteolysis-targeting chimera (PROTAC) degrader of PARP1 that can activate the cGAS/STING immunity pathway combined with daunorubicin. *Bioorganic & Medicinal Chemistry* **70**, 116912.
  96. Cheng, B., Ren, Y., Cao, H., and Chen, J. (2020). Discovery of novel resorcinol diphenyl ether-based PROTAC-like molecules as dual inhibitors and degraders of PD-L1. *European Journal of Medicinal Chemistry* **199**, 112377.
  97. Shen, Y., Gao, G., Yu, X., et al. (2020). Discovery of First-in-Class Protein Arginine Methyltransferase 5 (PRMT5) Degradators. *Journal of Medicinal Chemistry* **63**, 9977-9989.
  98. Farnaby, W., Koegl, M., Roy, M.J., et al. (2019). BAF complex vulnerabilities in cancer demonstrated via structure-based PROTAC design. *Nature Chemical Biology* **15**, 672-680.
  99. Zeng, M., Xiong, Y., Safaei, N., et al. (2020). Exploring Targeted Degradation Strategy for Oncogenic KRAS G12C. *Cell Chemical Biology* **27**, 19-31.e16.
  100. Bond, M.J., Chu, L., Nalawansa, D.A., et al. (2020). Targeted Degradation of Oncogenic KRASG12C by VHL-Recruiting PROTACs. *ACS Cent Sci* **6**, 1367-1375.
  101. Yang, F., Wen, Y., Wang, C., et al. (2022). Efficient targeted oncogenic KRASG12C degradation via first reversible-covalent PROTAC. *European Journal of Medicinal Chemistry* **230**, 114088.
  102. Zhou, C., Fan, Z., Zhou, Z., et al. (2022). Discovery of the First-in-Class Agonist-Based SOS1 PROTACs Effective in Human Cancer Cells Harboring Various KRAS Mutations. *J Med Chem* **65**, 3923-3942.
  103. Maniaci, C., Hughes, S.J., Testa, A., et al. (2017). Homo-PROTACs: bivalent small-molecule dimerizers of the VHL E3 ubiquitin ligase to induce self-degradation. *Nature Communications* **8**, 830.

104. Song, Y., Park, P.M.C., Wu, L., et al. (2019). Development and preclinical validation of a novel covalent ubiquitin receptor Rpn13 degrader in multiple myeloma. *Leukemia* **33**, 2685-2694.
105. Silva, M.C., Ferguson, F.M., Cai, Q., et al. (2019). Targeted degradation of aberrant tau in frontotemporal dementia patient-derived neuronal cell models. *eLife* **8**, e45457.
106. Bensimon, A., Pizzagalli, M.D., Kartnig, F., et al. (2020). Targeted Degradation of SLC Transporters Reveals Amenability of Multi-Pass Transmembrane Proteins to Ligand-Induced Proteolysis. *Cell Chemical Biology* **27**, 728-739.e729.
107. Li, Y., Yang, J., Aguilar, A., et al. (2019). Discovery of MD-224 as a First-in-Class, Highly Potent, and Efficacious Proteolysis Targeting Chimera Murine Double Minute 2 Degradable Capable of Achieving Complete and Durable Tumor Regression. *Journal of Medicinal Chemistry* **62**, 448-466.
108. Wang, B., Wu, S., Liu, J., et al. (2019). Development of selective small molecule MDM2 degraders based on nutlin. *European Journal of Medicinal Chemistry* **176**, 476-491.
109. de Wispelaere, M., Du, G., Donovan, K.A., et al. (2019). Small molecule degraders of the hepatitis C virus protease reduce susceptibility to resistance mutations. *Nature Communications* **10**, 3468.
110. Winzker, M., Friese, A., Koch, U., et al. (2020). Development of a PDE $\delta$ -Targeting PROTACs that Impair Lipid Metabolism. *Angewandte Chemie International Edition* **59**, 5595-5601.
111. Cheng, J., Li, Y., Wang, X., et al. (2020). Discovery of Novel PDE $\delta$  Degradable for the Treatment of KRAS Mutant Colorectal Cancer. *Journal of Medicinal Chemistry* **63**, 7892-7905.
